# Supplementary material
Source: bioRxiv or medRxiv preprint supplement (https://medrxiv.org/highwire/filestream/85031/field_highwire_adjunct_files/0/2020.06.06.20124487-1.pdf)
Supplement: Supplementary file [file 2020.06.06.20124487-1.pdf]

## Supplementary Materials for

Are women leaders significantly better at controlling the contagion?

Soumik Purkayastha<sup>1</sup>, Maxwell Salvatore<sup>1,2</sup>, Bhramar Mukherjee<sup>1,2\*</sup>.

<sup>1</sup>: Department of Biostatistics, University of Michigan, Ann Arbor, MI 48109, USA

<sup>2</sup>: Center for Precision Health Data Science, University of Michigan, Ann Arbor, MI 48109, USA

Correspondence to: [bhramar@umich.edu](mailto:bhramar@umich.edu)

**This Supplementary Material file includes:**

Supplementary Figures. S1 and S2.

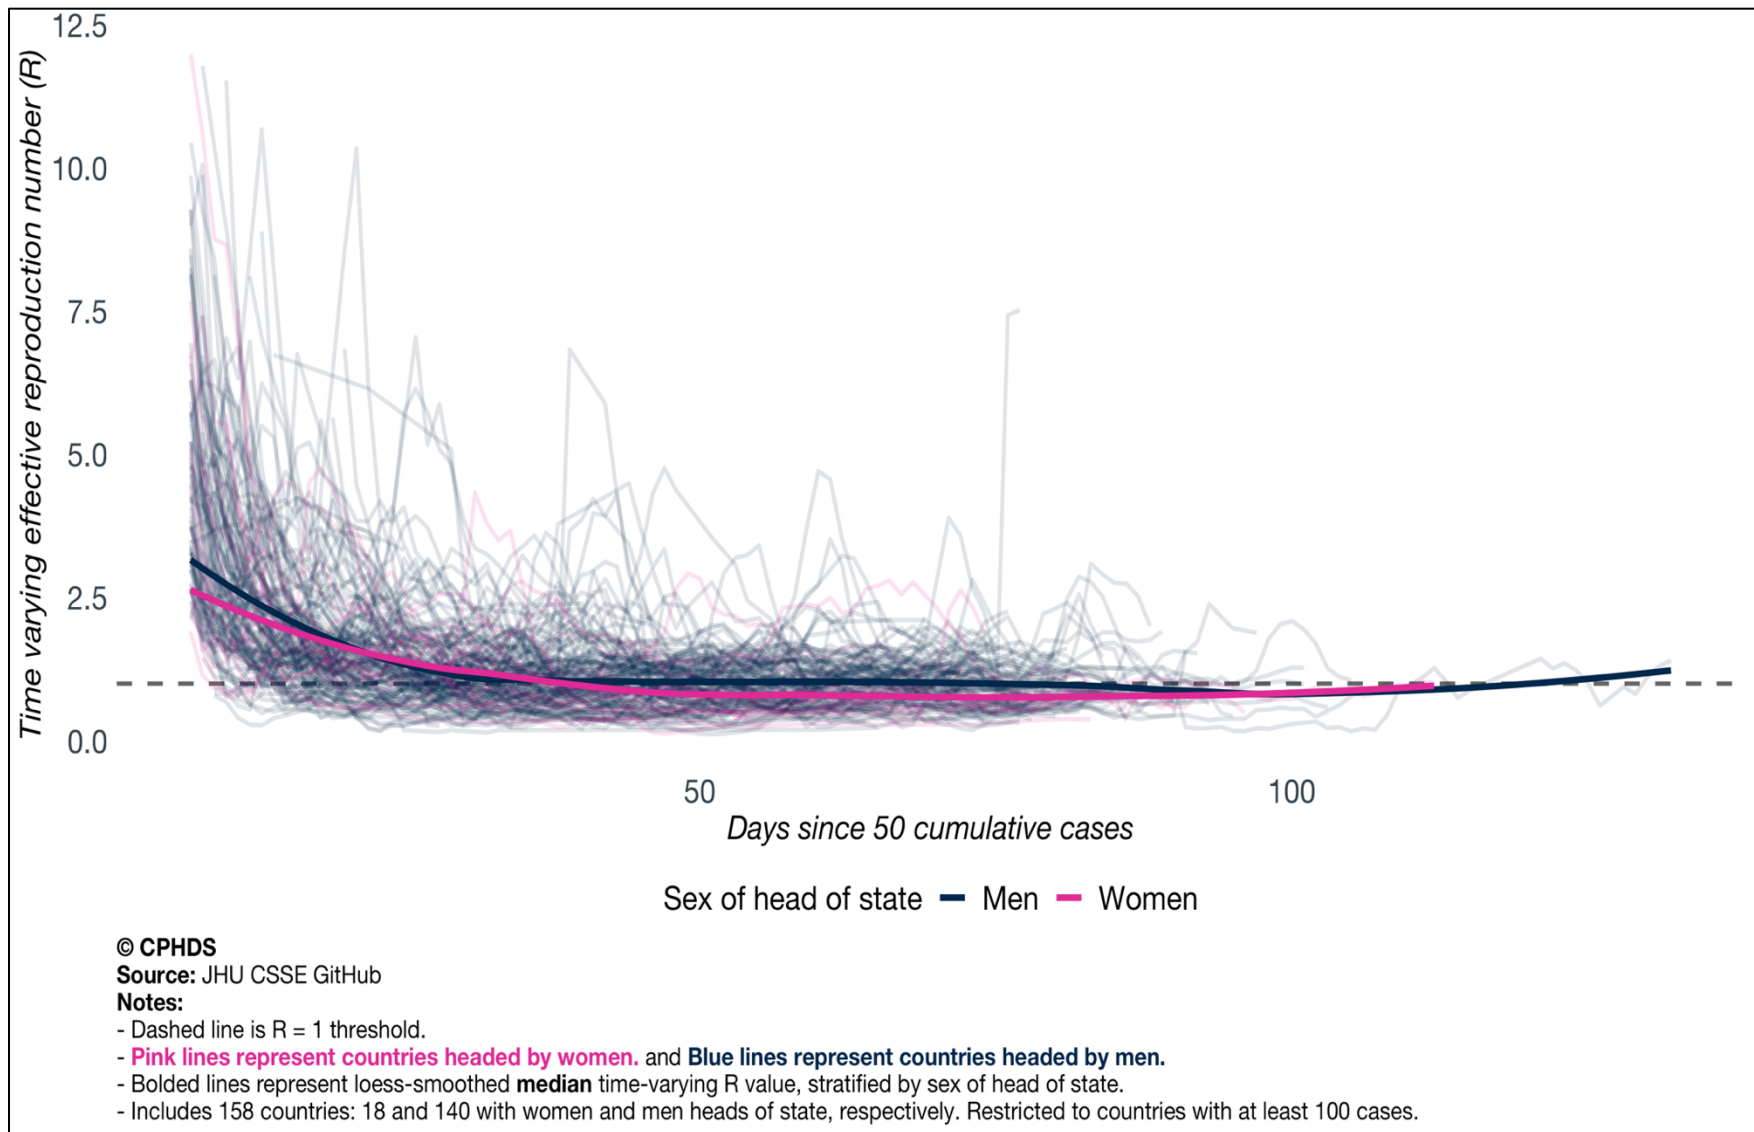

**Fig. S1.** Time varying plot of the effective time varying reproduction number of all 158 countries, with locally smoothed trajectories of median of time-varying reproduction number, stratified by sex of head of state.

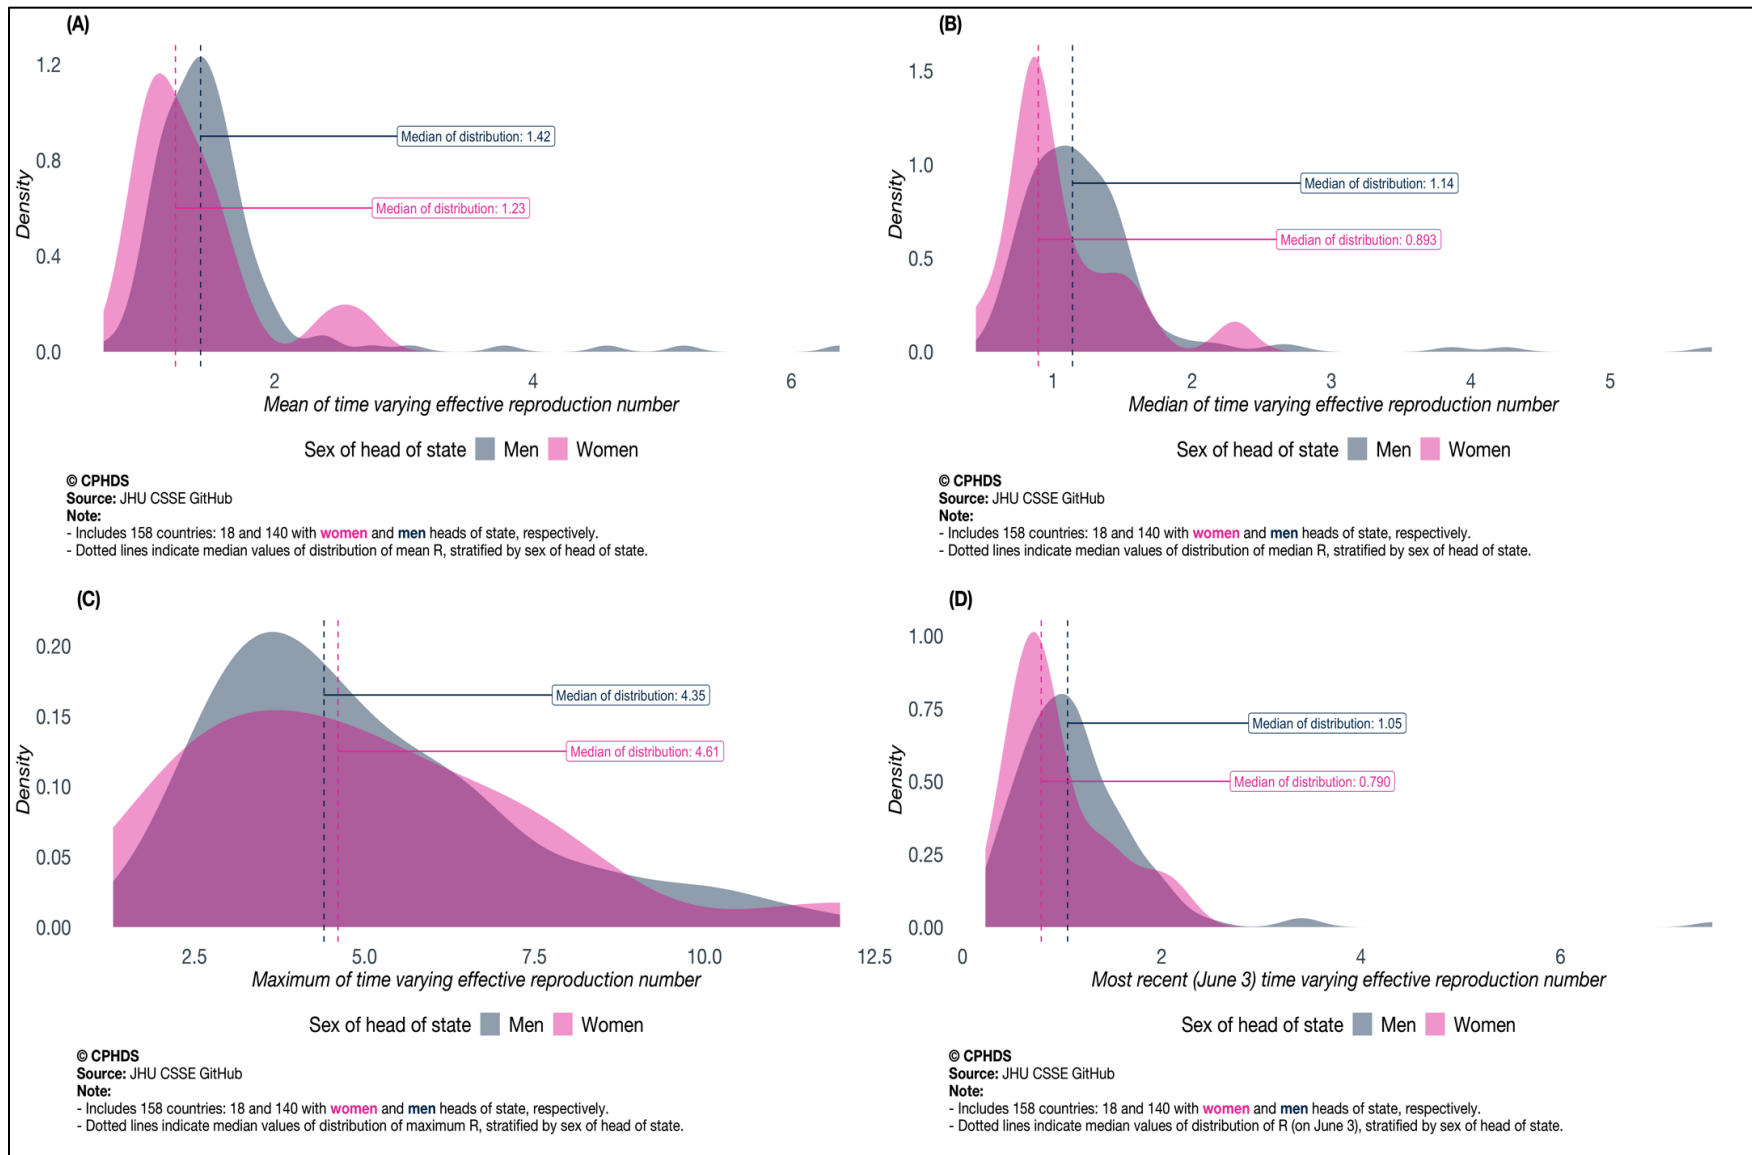

**Fig. S2.** Distributions of (A) mean, (B) median, (C) maxima and (D) most recent values of time-varying reproduction number, stratified by sex of head of state.
